# Supplementary material
Source: PubMed Central journal article supplement (PMC2916574)
Supplement: supp_48_8_2809__1.pdf [file supp_48_8_2809__1.pdf]

## Supplemental Data.

TABLE 1. Fungal isolates identified by phenotypic and/or molecular methods in the laboratory from January 2005 to October 2009.

| Species <sup>a</sup>              | Total isolates (n) | Subjected to ITS sequence analysis (n) | Species <sup>a</sup>                | Total isolates (n) | Subjected to ITS sequence analysis (n) |
|-----------------------------------|--------------------|----------------------------------------|-------------------------------------|--------------------|----------------------------------------|
| <i>Penicillium</i> sp.            | 1969               | 3                                      | <i>Rhizopus stolonifer</i>          | 3                  | 0                                      |
| <i>Aspergillus fumigatus</i>      | 1563               | 9                                      | <i>Corioliopsis gallica</i>         | 2                  | 2                                      |
| <i>Cladosporium</i> sp.           | 485                | 1                                      | <i>Curvularia trifolii</i>          | 2                  | 2                                      |
| <i>Aspergillus niger</i>          | 237                | 0                                      | <i>Gymnoascus</i> sp.               | 2                  | 2                                      |
| <i>Aspergillus versicolor</i>     | 185                | 1                                      | <i>Hormographiella aspergillata</i> | 2                  | 2                                      |
| <i>Fusarium</i> sp.               | 179                | 9                                      | <i>Phanerochaete sordida</i>        | 2                  | 2                                      |
| <i>Aspergillus flavus</i>         | 152                | 3                                      | <i>Phlebia lindtneri</i>            | 2                  | 2                                      |
| <i>Alternaria</i> sp.             | 151                | 14                                     | <i>Trametes versicolor</i>          | 2                  | 2                                      |
| <i>Aspergillus glaucus</i>        | 108                | 1                                      | <i>Fusarium dimerum</i>             | 2                  | 1                                      |
| <i>Geotrichum candidum</i>        | 89                 | 1                                      | <i>Mucor circinnelloides</i>        | 2                  | 1                                      |
| <i>Beauveria</i> sp.              | 66                 | 0                                      | <i>Scytalidium</i> sp.              | 2                  | 1                                      |
| <i>Aspergillus nidulans</i>       | 60                 | 0                                      | <i>Bipolaris</i> sp.                | 2                  | 0                                      |
| <i>Aspergillus terreus</i>        | 60                 | 0                                      | <i>Cylindrocarpon</i> sp.           | 2                  | 0                                      |
| <i>Phoma</i> sp.                  | 59                 | 1                                      | <i>Gliogladium</i> sp.              | 2                  | 0                                      |
| <i>Aspergillus ochraceus</i>      | 58                 | 0                                      | <i>Sagrahamala</i> sp.              | 2                  | 0                                      |
| <i>Aspergillus</i> sp.            | 57                 | 2                                      | <i>Acremonium strictum</i>          | 1                  | 1                                      |
| <i>Scedosporium apiospermum</i>   | 52                 | 4                                      | <i>Alternaria infectoria</i>        | 1                  | 1                                      |
| <i>Acremonium</i> sp.             | 46                 | 7                                      | <i>Aporospora</i> sp.               | 1                  | 1                                      |
| <i>Trichoderma</i> sp.            | 45                 | 0                                      | <i>Aspergillus sydowii</i>          | 1                  | 1                                      |
| <i>Botrytis</i> sp.               | 40                 | 0                                      | <i>Bipolaris hawaiiensis</i>        | 1                  | 1                                      |
| <i>Trichurus</i> sp.              | 40                 | 0                                      | <i>Chalara microchona</i>           | 1                  | 1                                      |
| <i>Exophiala</i> sp.              | 37                 | 2                                      | <i>Clavicipitaceae</i> sp.          | 1                  | 1                                      |
| <i>Chaetomium</i> sp.             | 35                 | 0                                      | <i>Clitocybe</i> sp.                | 1                  | 1                                      |
| <i>Geotrichum</i> sp.             | 34                 | 0                                      | <i>Corynascus</i> sp.               | 1                  | 1                                      |
| <i>Mucor</i> sp.                  | 34                 | 0                                      | <i>Curvularia inaequalis</i>        | 1                  | 1                                      |
| <i>Paecilomyces</i> sp.           | 31                 | 3                                      | <i>Curvularia lunata</i>            | 1                  | 1                                      |
| <i>Curvularia</i> sp.             | 31                 | 0                                      | <i>Diaporthe helianthi</i>          | 1                  | 1                                      |
| <i>Ulocladium</i> sp.             | 30                 | 0                                      | <i>Drechslera dematioidea</i>       | 1                  | 1                                      |
| <i>Epicoccum</i> sp.              | 27                 | 0                                      | <i>Epicoccum nigrum</i>             | 1                  | 1                                      |
| <i>Chrysosporium</i> sp.          | 26                 | 2                                      | <i>Exophiala oligosperma</i>        | 1                  | 1                                      |
| <i>Paecilomyces lilacinus</i>     | 26                 | 2                                      | <i>Exophiala pisciphila</i>         | 1                  | 1                                      |
| <i>Scopulariopsis brevicaulis</i> | 23                 | 0                                      | <i>Fomitopsis pinkola</i>           | 1                  | 1                                      |
| <i>Scedosporium prolificans</i>   | 22                 | 0                                      | <i>Gymnascella dankaliensis</i>     | 1                  | 1                                      |
| <i>Rhizopus</i> sp.               | 16                 | 0                                      | <i>Hormographiella verticillata</i> | 1                  | 1                                      |
| <i>Scopulariopsis</i> sp.         | 16                 | 0                                      | <i>Irpex lacteus</i>                | 1                  | 1                                      |
| <i>Absidia corymbifera</i>        | 15                 | 3                                      | <i>Lecanicillium</i> sp.            | 1                  | 1                                      |
| <i>Schizophyllum commune</i>      | 13                 | 13                                     | <i>Leptosphaerulina chartarum</i>   | 1                  | 1                                      |
| <i>Fusarium solani</i>            | 12                 | 10                                     | <i>Malbranchea dendritica</i>       | 1                  | 1                                      |
| <i>Paecilomyces variotii</i>      | 12                 | 0                                      | <i>Mucor fragilis</i>               | 1                  | 1                                      |
| <i>Phialophora</i> sp.            | 11                 | 1                                      | <i>Myrothecium atrum</i>            | 1                  | 1                                      |
| <i>Phialophora richardsiae</i>    | 10                 | 1                                      | <i>Myrothecium</i> sp.              | 1                  | 1                                      |
| <i>Aureobasidium pullulans</i>    | 8                  | 8                                      | <i>Onychocola canadensis</i>        | 1                  | 1                                      |
| <i>Fusarium oxysporum</i>         | 7                  | 5                                      | <i>Paecilomyces inflatus</i>        | 1                  | 1                                      |
| <i>Rhizopus microsporus</i>       | 7                  | 0                                      | <i>Paraconiothyrium brasiliense</i> | 1                  | 1                                      |
| <i>Verticillium</i> sp.           | 7                  | 0                                      | <i>Penicillium rolfsii</i>          | 1                  | 1                                      |
| <i>Scytalidium dimidiatum</i>     | 6                  | 5                                      | <i>Phialophora europaea</i>         | 1                  | 1                                      |
| <i>Monilia</i> sp.                | 6                  | 0                                      | <i>Phlebia tremellosa</i>           | 1                  | 1                                      |
| <i>Chaetomium globosum</i>        | 5                  | 5                                      | <i>Polyporus</i> sp.                | 1                  | 1                                      |
| <i>Eutypella scoparia</i>         | 5                  | 5                                      | <i>Pyrenochaeta romeroi</i>         | 1                  | 1                                      |
| <i>Syncephalastrum</i> sp.        | 5                  | 1                                      | <i>Scedosporium aurantiacum</i>     | 1                  | 1                                      |
| <i>Apiospora</i> sp.              | 5                  | 0                                      | <i>Scopulariopsis cinereus</i>      | 1                  | 1                                      |
| <i>Cunninghamella</i> sp.         | 5                  | 0                                      | <i>Sporothrix schenckii</i>         | 1                  | 1                                      |
| <i>Pithomyces</i> sp.             | 5                  | 0                                      | <i>Thermomyces lanuginosus</i>      | 1                  | 1                                      |
| <i>Rhizopus oryzae</i>            | 5                  | 0                                      | <i>Tilletiopsis pallescens</i>      | 1                  | 1                                      |
| <i>Phoma glomerata</i>            | 4                  | 4                                      | <i>Tilletiopsis washingtonensis</i> | 1                  | 1                                      |
| <i>Aspergillus candidus</i>       | 4                  | 1                                      | <i>Tilletiopsis</i> sp.             | 1                  | 1                                      |
| <i>Exophiala dermatitidis</i>     | 4                  | 1                                      | <i>Trametes hirsuta</i>             | 1                  | 1                                      |
| <i>Geomyces</i> sp.               | 4                  | 0                                      | <i>Verticillium luteo-album</i>     | 1                  | 1                                      |
| <i>Bjerkandera adusta</i>         | 3                  | 3                                      | <i>Acrophialophora</i> sp.          | 1                  | 0                                      |
| <i>Penicillium mameffeii</i>      | 3                  | 3                                      | <i>Aphanoascus fulvescens</i>       | 1                  | 0                                      |
| <i>Engyodontium album</i>         | 3                  | 1                                      | <i>Aspergillus ustus</i>            | 1                  | 0                                      |
| <i>Arthrinium phaeospermum</i>    | 3                  | 0                                      | <i>Cladophialophora</i> sp.         | 1                  | 0                                      |
| <i>Aureobasidium</i> sp.          | 3                  | 0                                      | <i>Coniothyrium fuckelii</i>        | 1                  | 0                                      |
| <i>Histoplasma capsulatum</i>     | 3                  | 0                                      | <i>Exserohilum</i> sp.              | 1                  | 0                                      |
| <i>Hormographiella</i> sp.        | 3                  | 0                                      | <i>Madurella grisea</i>             | 1                  | 0                                      |
| <i>Lecythophora</i> sp.           | 3                  | 0                                      | <i>Phytophthora</i> sp.             | 1                  | 0                                      |
| <i>Ochroconis</i> sp.             | 3                  | 0                                      | No identification by any method     | 531                | 38                                     |
| <i>Rhizomucor pusillus</i>        | 3                  | 0                                      |                                     |                    |                                        |
| <i>Rhizomucor</i> sp.             | 3                  | 0                                      | <b>Total</b>                        | <b>6900</b>        | <b>233</b>                             |

<sup>a</sup> Identification based on combined phenotypic and/or sequence analysis
